# Supplementary material for: Oral administration of azithromycin ameliorates trypanosomosis in Trypanosoma congolense-infected mice
Source: Springer Nature journal article supplement (doi:10.1007/s00436-017-5542-7), 2017-07-03
Supplement: MOESM1 [file 436_2017_5542_MOESM1_ESM.pdf]

Oral Administration of Azithromycin Ameliorates Trypanosomosis in *Trypanosoma congolense*-infected Mice

Parasitology Research

Nthatisi Innocentia Molefe, Shino Yamasaki, Adrian Miki C Macalanda, Keisuke Suganuma, Kenichi Watanabe, Xuenan Xuan, Noboru Inoue<sup>#</sup>

<sup>#</sup> Address correspondence to Dr. Noboru Inoue, D.V.M., Ph.D., ircpmi@obihiro.ac.jp, Obihiro University of Agriculture and Veterinary Medicine, Inada, Obihiro, Hokkaido 080-8555, Japan.

Tel.: +81-155-49-5647; Fax: +81-155-49-5643

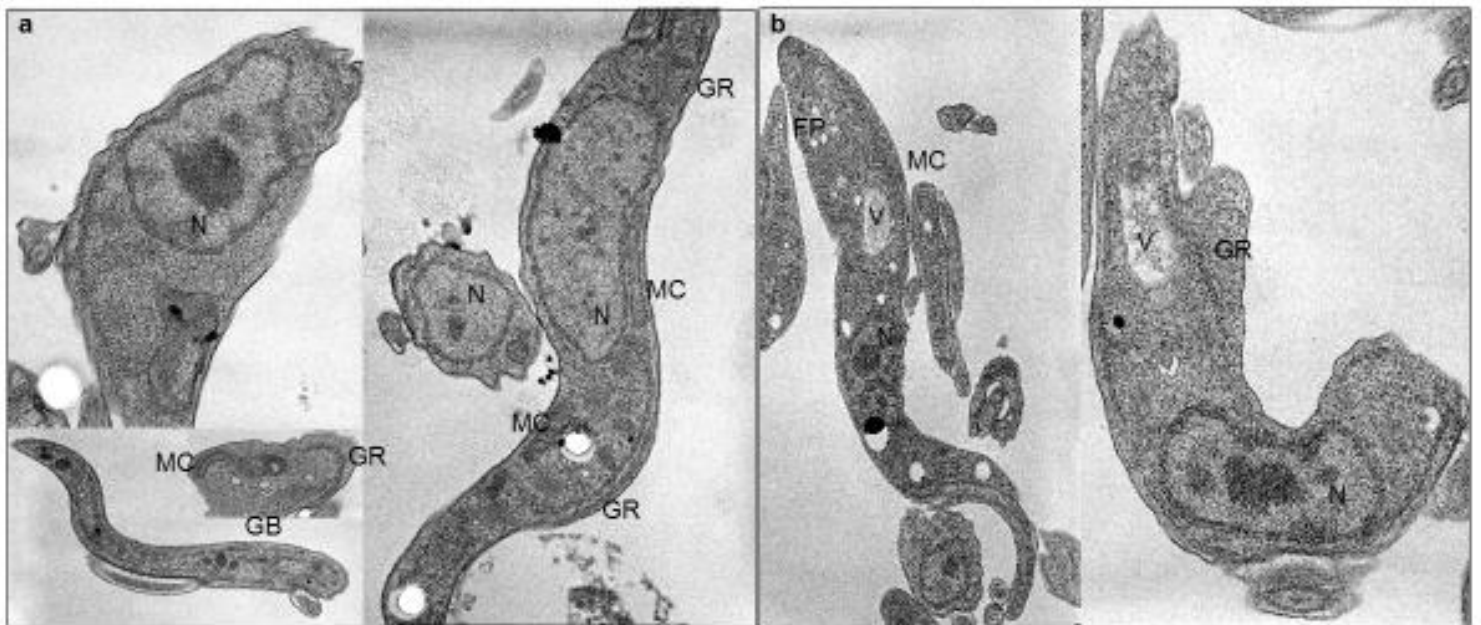

**Fig. A1** The effects of AZM on the cellular morphology of *T. congolense* cells grown in HMI-9 in the **a** absence (control) and in the **b** presence of 25 µg/ml AZM for 7 hours monitored by using transmission electron microscopy (TEM). N, Nucleus; MC, Mitochondrial canal; GB, Golgi bodies; GR, Granular reticulum; FP, Flagellum pocket; V, Vacuole. The treated group showed the development or presence of a vacuole, degradation of the granular reticulum in comparison with the control group.
